# Supplementary material for: N-acetylglucosamine-6-O sulfation on intestinal mucins prevents obesity and intestinal inflammation by regulating gut microbiota
Source: JCI journal article supplement (doi:10.1172/jci.insight.165944), 2023-07-18
Supplement: sd1 [file 1]

**Supplemental Figure**

***N*-acetylglucosamine-6-*O*-sulfation on intestinal mucins prevents obesity and  
intestinal inflammation by regulating gut microbiota**

**Abo et al.**

**This PDF file includes supplemental figure 1 to 10**

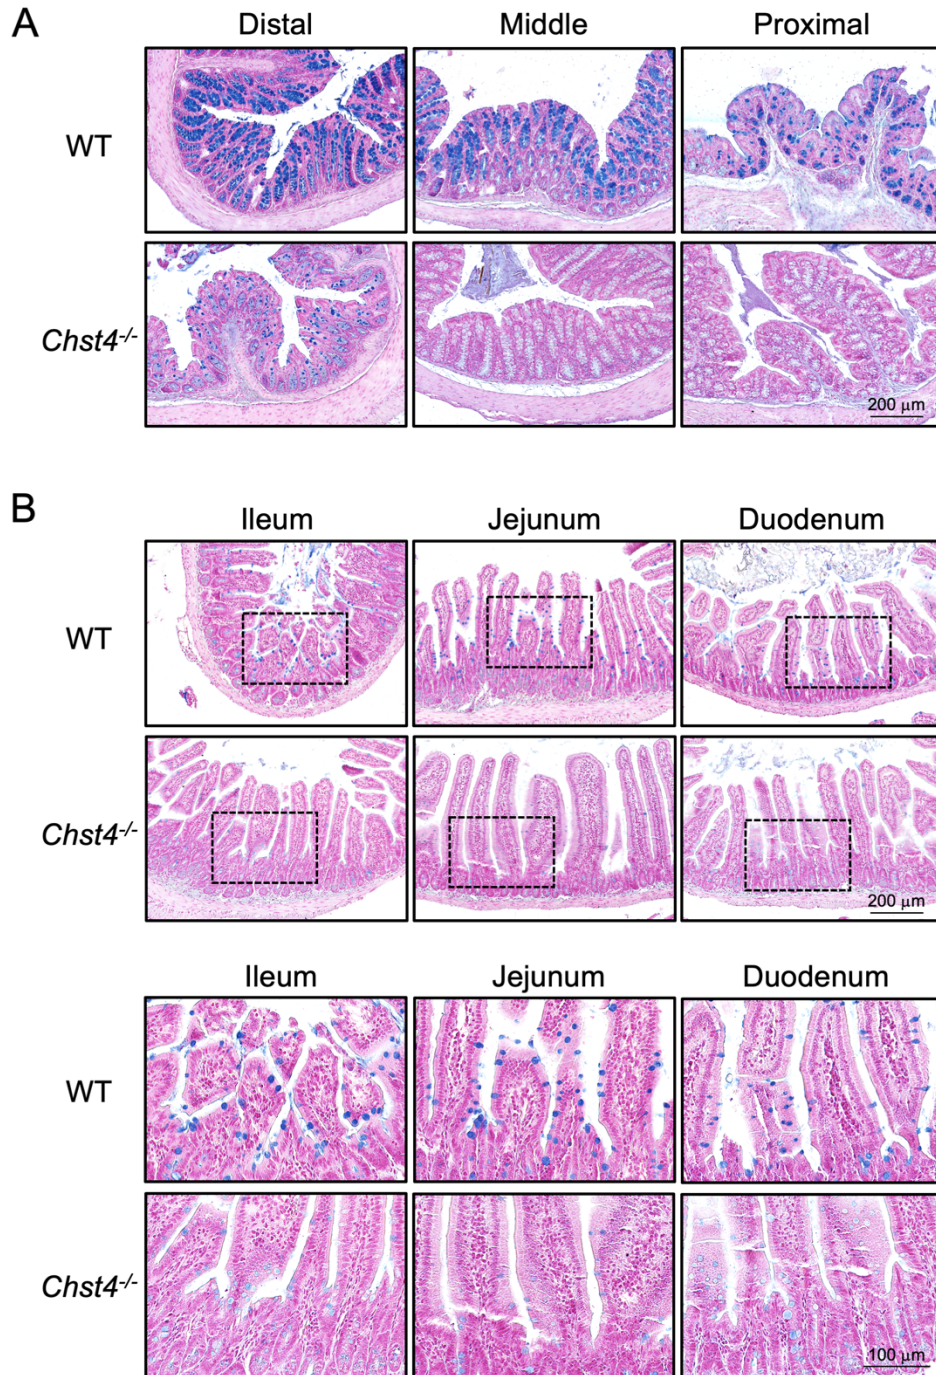

**Supplemental Fig. 1. Deletion of *Chst4* results in a remarkable loss of sulfation in intestinal tissues as confirmed by Alcian blue staining.**

**(A)** Alcian blue staining (pH 1.0) of the large intestine in WT and *Chst4*<sup>-/-</sup> mice. **(B)** Alcian blue staining (pH 1.0) of the small intestine in WT and *Chst4*<sup>-/-</sup> mice. Top panel; low magnification, bottom panel; high magnification.

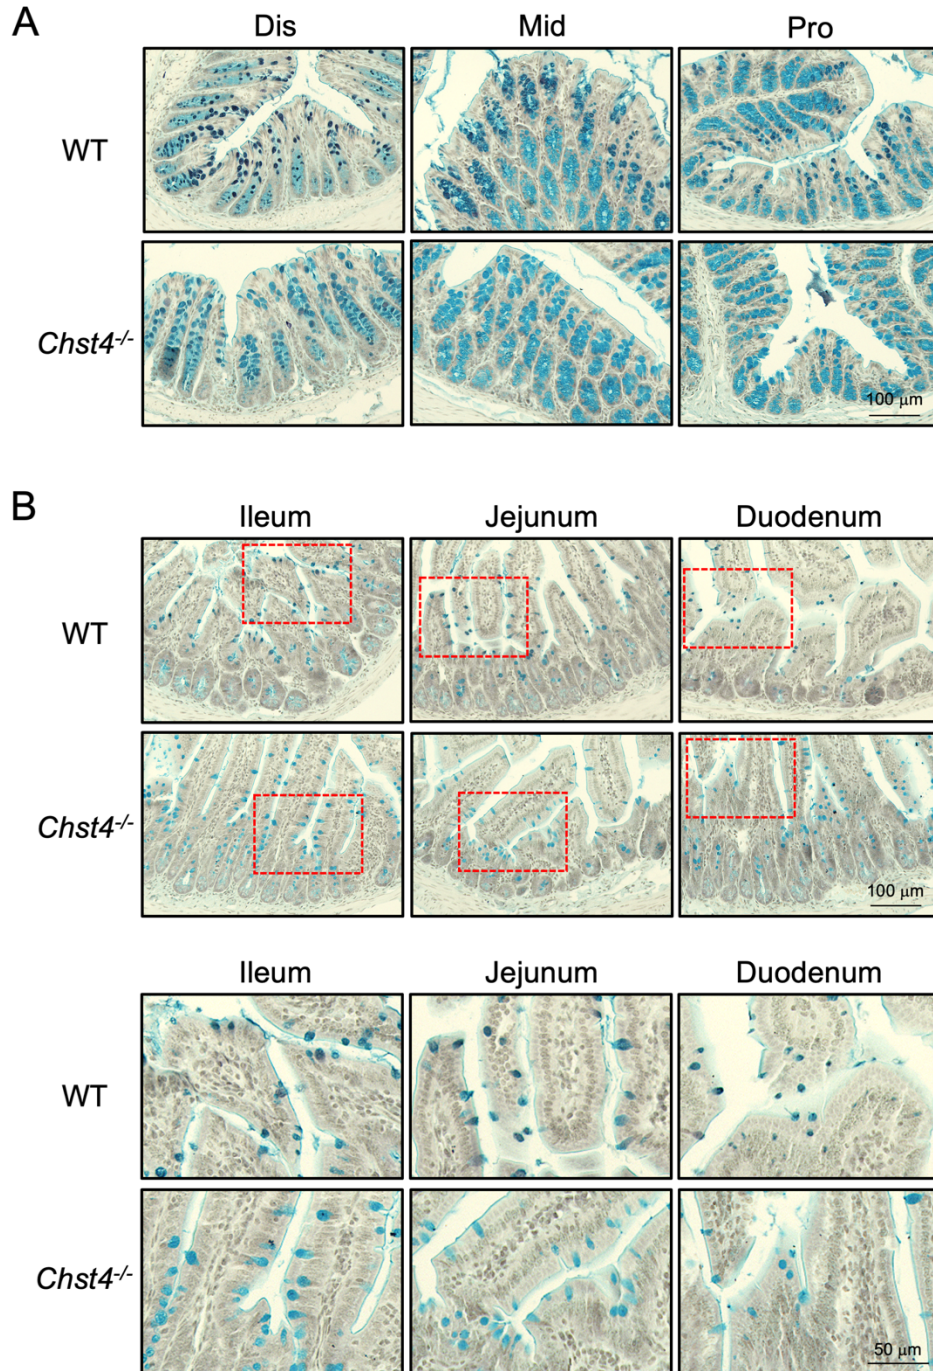

**Supplemental Fig. 2. Deletion of *Chst4* leads significant loss of sulfation in intestinal tissues as confirmed by HID-AB staining.**

**(A)** HID-AB staining (pH 2.5) of the large intestine in WT and *Chst4*<sup>-/-</sup> mice. **(B)** HID-AB staining (pH 2.5) of the small intestine in WT and *Chst4*<sup>-/-</sup> mice. Top panel; low magnification, bottom panel; high magnification.



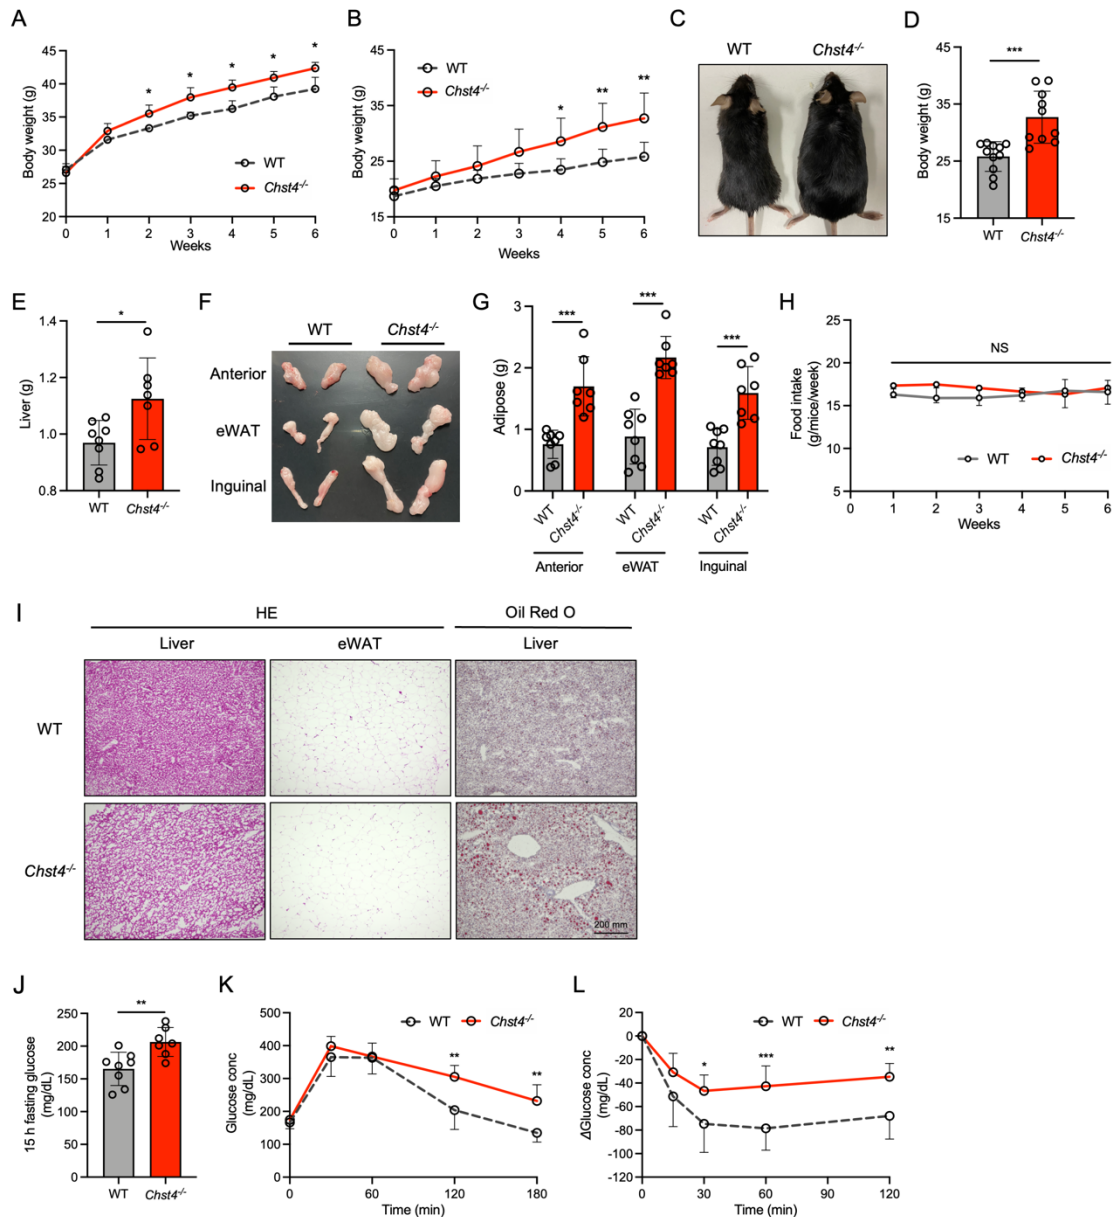

**Supplemental Fig. 3. *Chst4*<sup>-/-</sup> mice develop HFD-induced obesity.**

**(A)** Weight gain of male WT and *Chst4*<sup>-/-</sup> mice over time (n = 3). **(B)** Weight gain in female WT and *Chst4*<sup>-/-</sup> mice fed an HFD for 6 weeks. **(C)** Representative images of WT and *Chst4*<sup>-/-</sup> mice after 6 weeks feeding of HFD. **(D)** Total weight of WT and *Chst4*<sup>-/-</sup> mice fed an HFD (WT n = 11, *Chst4*<sup>-/-</sup> n = 10). **(E)** Liver weight in WT and *Chst4*<sup>-/-</sup> mice. **(F)** Representative image of the adipose tissue. **(G)** Adipose tissues weight of WT and *Chst4*<sup>-/-</sup> mice (WT n = 8, *Chst4*<sup>-/-</sup> n = 7). **(H)** Food intake was measured based on the weight of the HFD (n = 4). **(I)** Representative images of the liver and adipose tissues stained with HE and Oil Red O in WT and *Chst4*<sup>-/-</sup> mice. **(J)** 15-h fasting blood glucose concentration after 6 weeks of HFD feeding. **(K)** Blood glucose concentration in glucose tolerance tests. **(L)** Change in blood glucose concentration in WT and *Chst4*<sup>-/-</sup> mice after



additional insulin challenge following 6 weeks of HFD feeding (WT n = 8, *Chst4*<sup>-/-</sup> n = 7). Data are representative of two independent experiments, and presented as the mean  $\pm$  SD; \**P* < 0.05, \*\**P* < 0.01, \*\*\**P* < 0.001 via unpaired, two-tailed *t*-tests or two-way ANOVA.

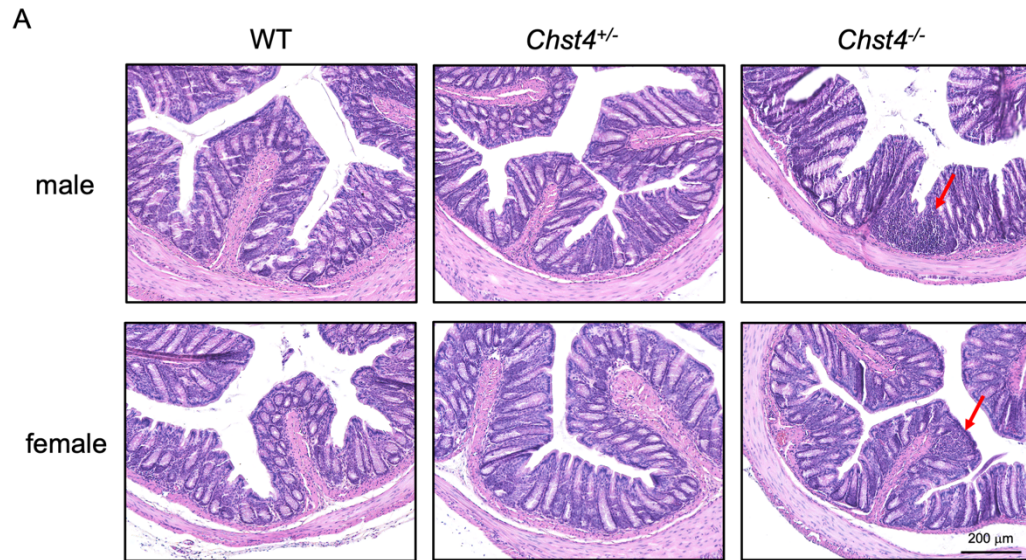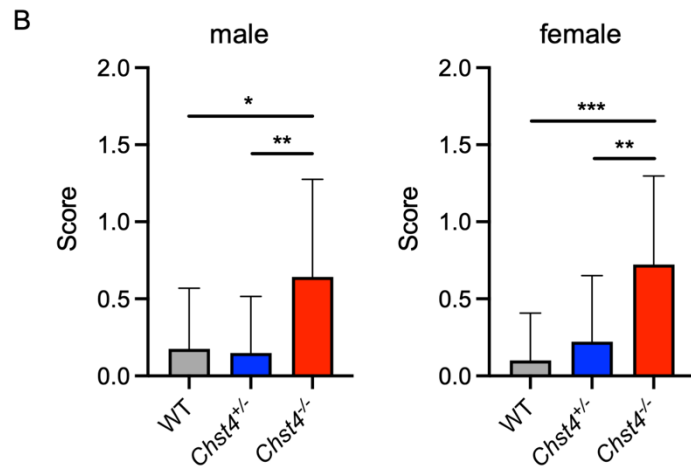

**Supplemental Fig. 4. *Chst4*<sup>-/-</sup> mice develop low grade inflammation.**

**(A)** Representative images of colon tissues from littermate control. **(B)** Histology score shown in A (male; WT n = 17, *Chst4*<sup>+/-</sup> n = 20, *Chst4*<sup>-/-</sup> n = 14, female; WT n = 20, *Chst4*<sup>+/-</sup> n = 18, *Chst4*<sup>-/-</sup> n = 18). Data are presented as the mean  $\pm$  SD; \**P* < 0.05, \*\**P* < 0.01, \*\*\**P* < 0.001 via one-way ANOVA with multiple comparison tests.

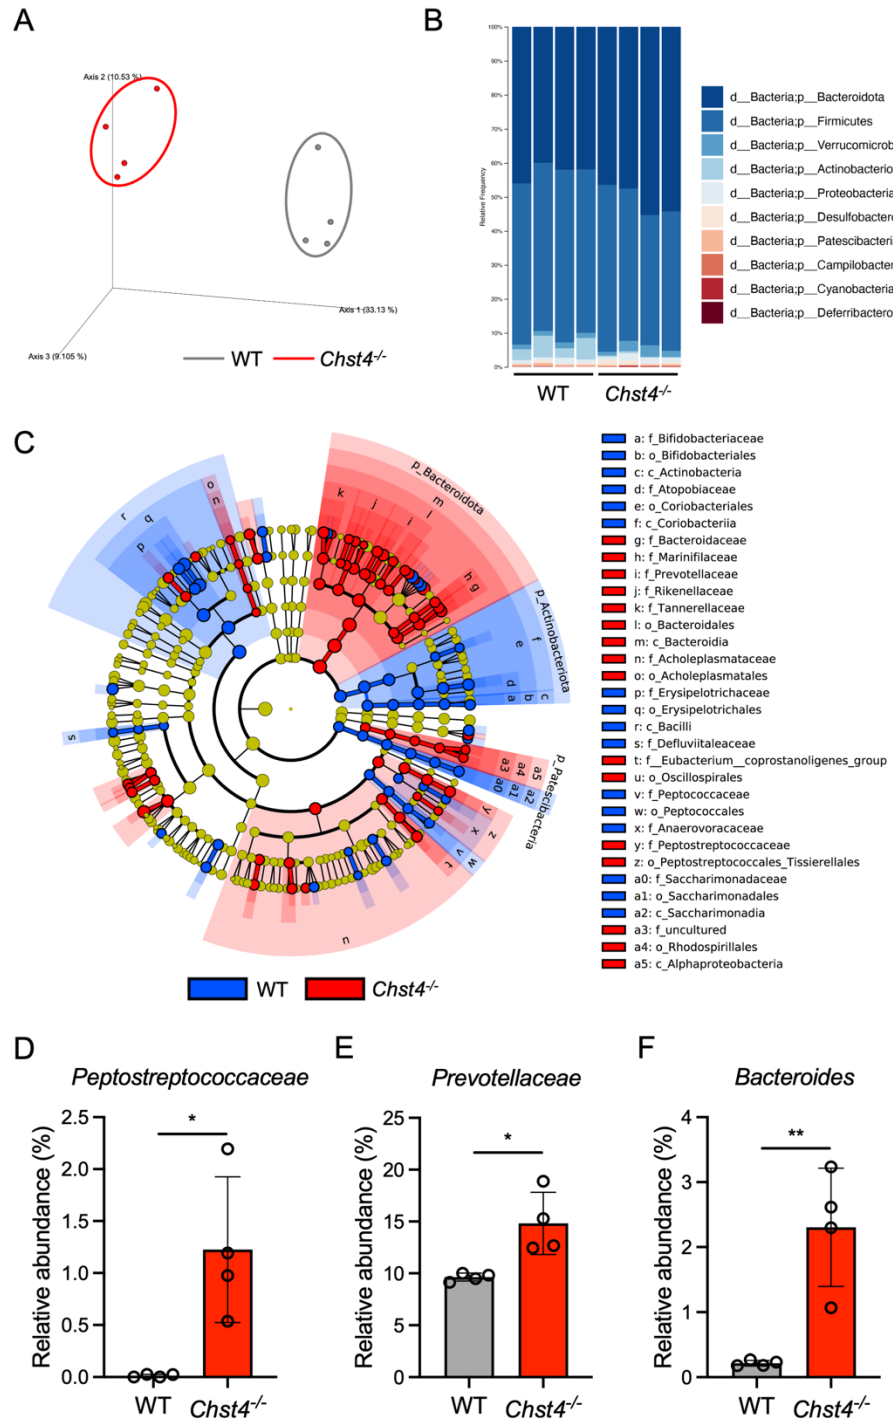

**Supplemental Fig. 5. Loss of mucin O-glycan sulfation alters fecal microbiota composition.**

**(A)** Principal coordinates analysis of fecal microbiota based on unweighted UniFrac distances.

**(B)** Relative abundance of bacteria at the phylum level. **(C)** LefSe analysis of colonic microbiota

taxa significantly different between WT and *Chst4<sup>-/-</sup>* mice (n = 4). **(D-F)** Relative abundance of

indicated bacteria in fecal samples from WT and *Chst4<sup>-/-</sup>* mice. Data are presented as the mean

± SD; \**P* < 0.05, \*\**P* < 0.01 via unpaired, two-tailed *t*-tests.



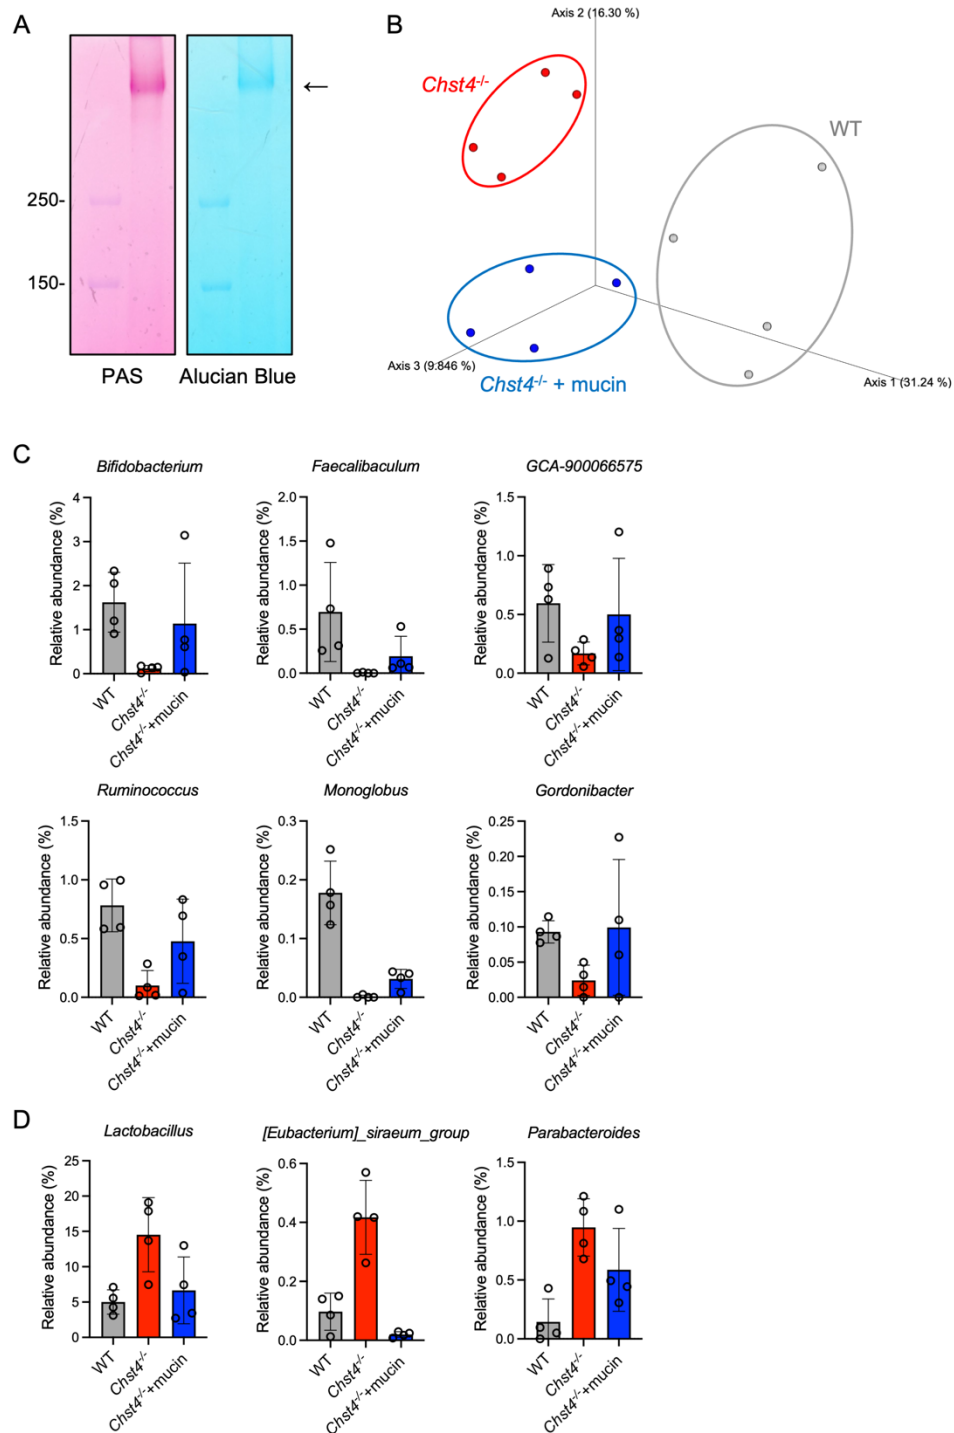

**Supplemental Fig. 6. Mucin administration alters bacteria composition in *Chst4<sup>-/-</sup>* mice.**

**(A)** PAS and Alcian blue staining (pH. 1.0) following SDS-PAGE. **(B)** Principal coordinates analysis of fecal microbiota based on unweighted UniFrac distances. **(C)** Bacteria genus that were increased by mucin administration. **(D)** Bacteria genus that were decreased by mucin administration.

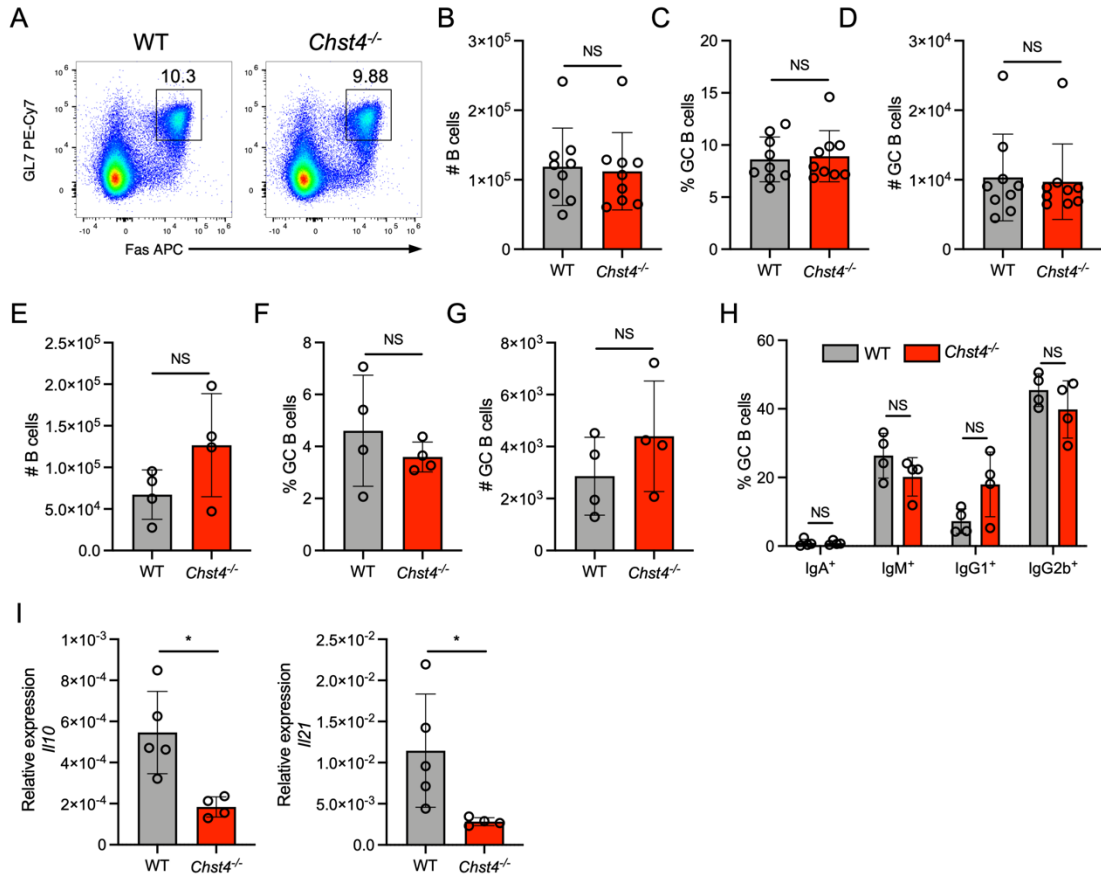

**Supplemental Fig. 7. B cell subsets in PPs and mLNs and expression of cytokines related to IgA production.**

(A) Representative FACS plot for GC B cells defined as CD45<sup>+</sup>CD19<sup>+</sup>GL7<sup>+</sup>Fas<sup>+</sup> in PPs from WT and *Chst4*<sup>-/-</sup> mice. (B) Absolute cell number of total B cells in PPs defined as CD45<sup>+</sup>CD19<sup>+</sup>. (C-D) Frequency and cell number of GC B cells shown in a (n = 9). (E) Absolute cell number of total B cells defined as CD45<sup>+</sup>CD19<sup>+</sup> in mLN. (F-G) Frequency and cell number of GC B cells in mLN. (H) Frequency of IgA<sup>+</sup>, IgM<sup>+</sup>, IgG1<sup>+</sup>, and IgG2b<sup>+</sup> GC B cells in mLN (n = 4). (I) Gene expression of cytokines related to IgA class switching, including *Il21* and *Il10*, analyzed by qPCR (WT n = 5, *Chst4*<sup>-/-</sup> n = 4). Data are representative of two independent experiments, and presented as the mean ± SD; NS; not significant, \*P < 0.05 via unpaired, two-tailed *t*-tests.

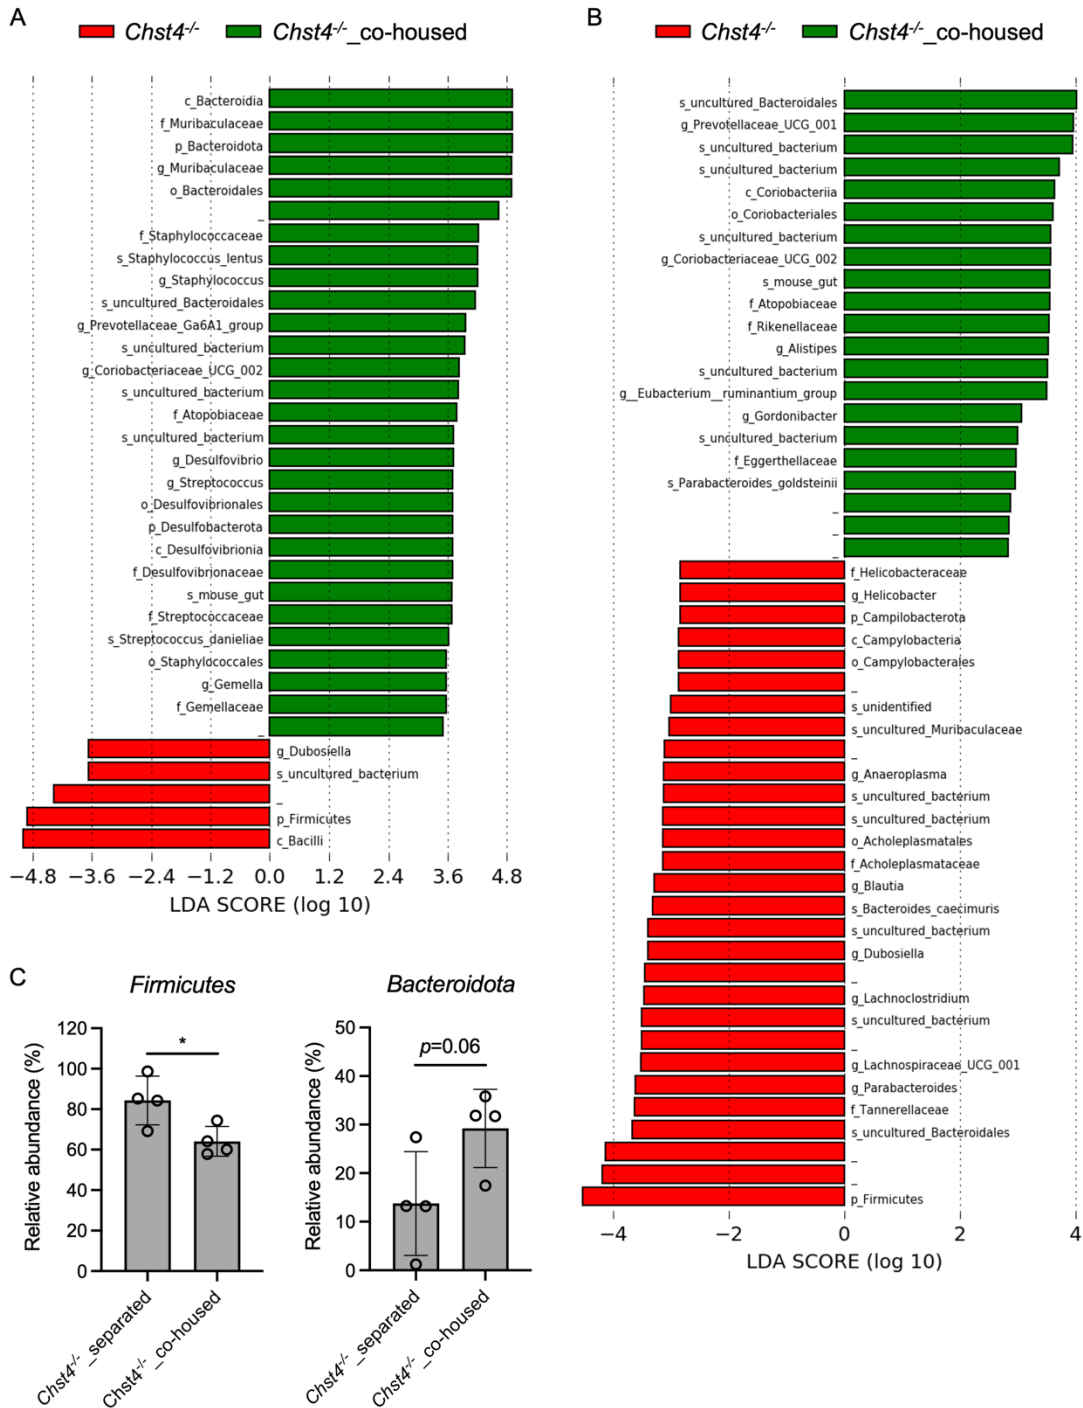

**Supplemental Fig. 8. *Chst4*<sup>-/-</sup> mice show different microbial composition after cohousing.** (A) LEfSe analysis of ileal microbiota that were significantly different between separated and co-housed *Chst4*<sup>-/-</sup> mice. (B) LEfSe analysis of fecal microbiota that were significantly different between separated and co-housed *Chst4*<sup>-/-</sup> mice. (C) Relative abundance of *Firmicutes* and *Bacteroidota* in ileal samples from separated and co-housed *Chst4*<sup>-/-</sup> mice. Data are presented as the mean  $\pm$  SD; \* $P < 0.05$ , \*\* $P < 0.01$  via unpaired, two-tailed *t*-tests.



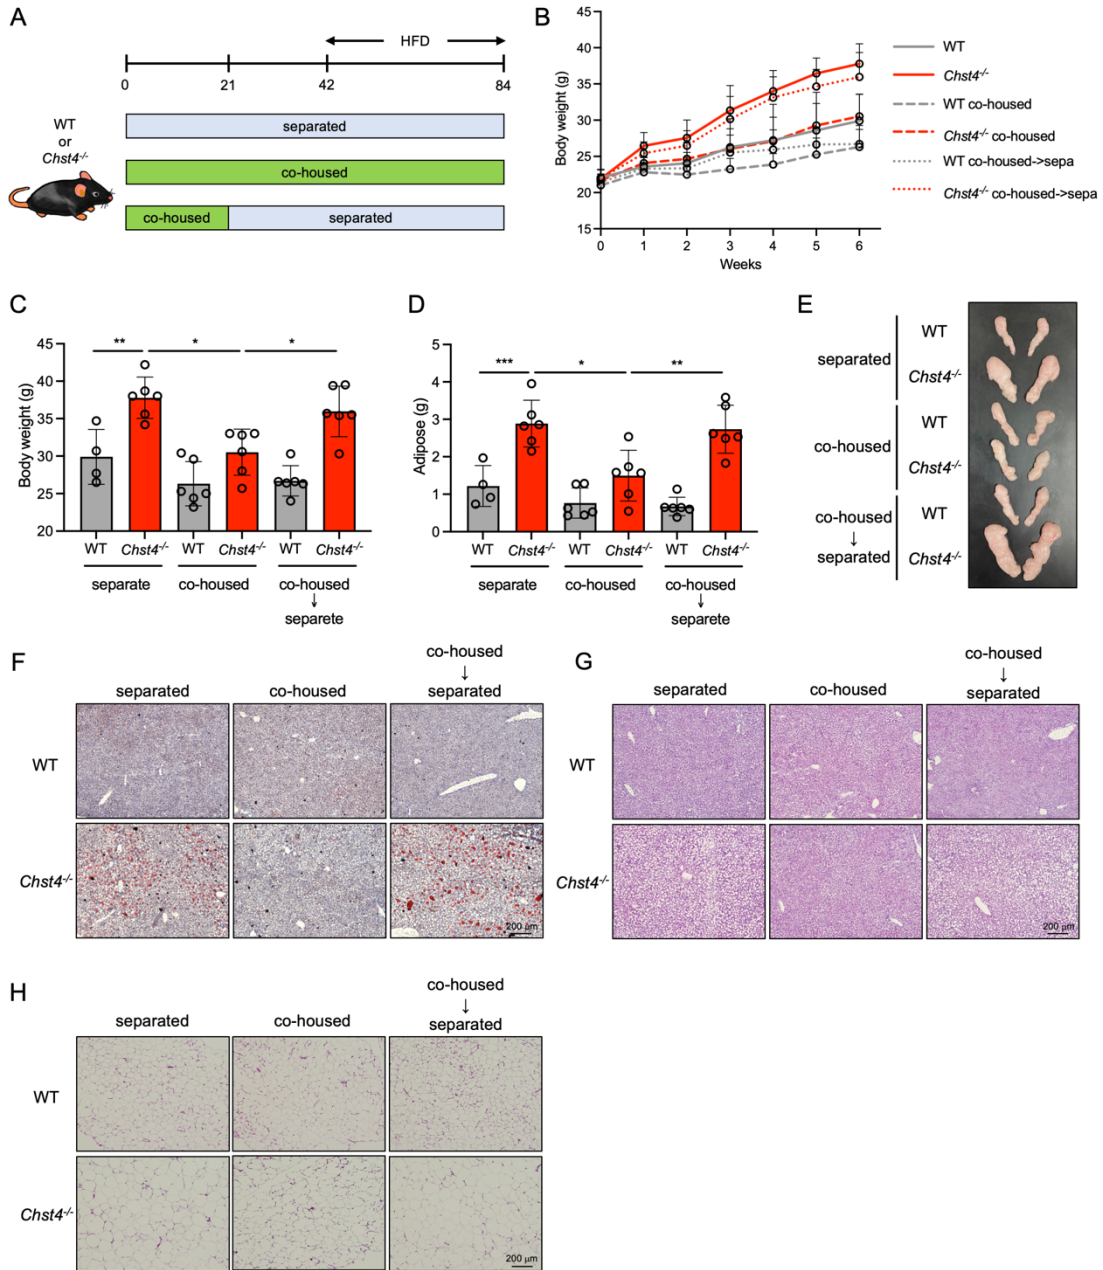

**Supplemental Fig. 9. Re-isolation after co-housing increased susceptibility to HFD-induced obesity in *Chst4*<sup>-/-</sup> mice.**

**(A)** The experimental schedule. **(B)** Weight gain of WT and *Chst4*<sup>-/-</sup> mice measured over a 6 week period. **(C)** Total weight of WT and *Chst4*<sup>-/-</sup> mice. **(D)** Adipose mass. **(E)** Representative image of the adipose tissues from WT and *Chst4*<sup>-/-</sup> mice. **(F)** Representative Oil Red O staining of the liver. **(G)** Representative HE staining of the liver. **(H)** Representative HE staining of the adipose tissues (WT n = 4, WT/co-housed n = 6, WT/co-housed→separate n = 6, *Chst4*<sup>-/-</sup> n = 6, *Chst4*<sup>-/-</sup>/co-housed n = 6, *Chst4*<sup>-/-</sup>/co-housed→separate n = 6). Data are presented as the mean ± SD; \**P* < 0.05, \*\**P* < 0.01, \*\*\**P* < 0.001 via one-way ANOVA with multiple comparison tests.

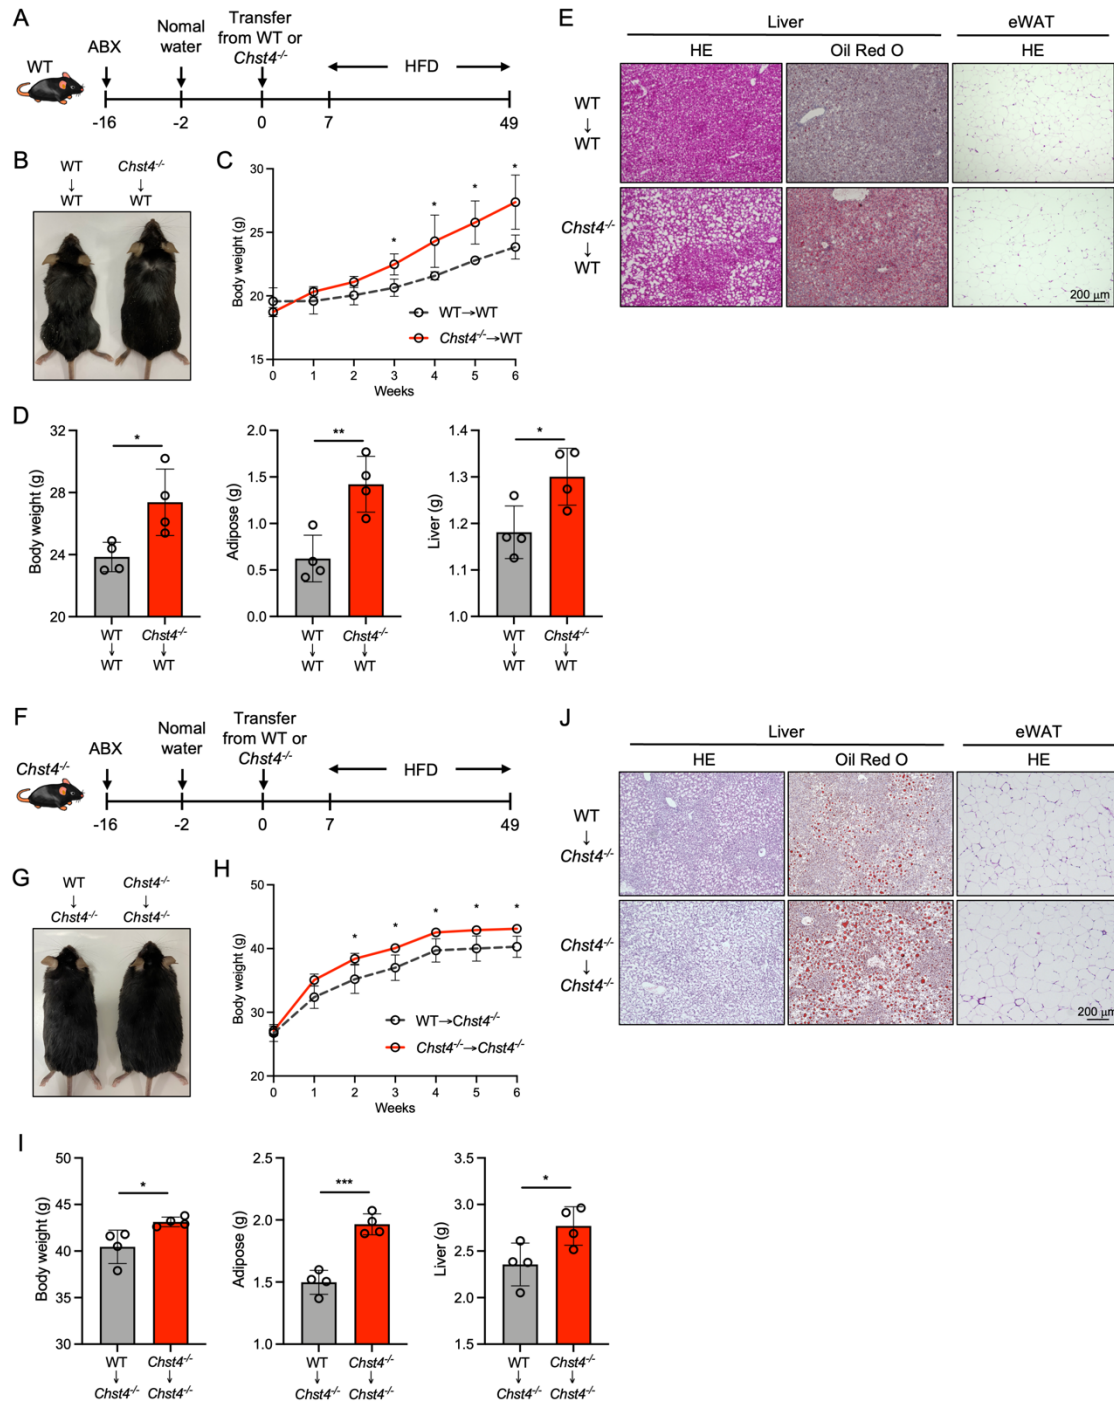

**Supplemental Fig. 10. Transfer of the microbiota from *Chst4*<sup>-/-</sup> mice induces metabolic syndrome phenotypes.**

(A) Ileal contents from mice of both genotypes were isolated and suspended in PBS, followed by transfer to Abx-treated WT mice. After transfer, mice were fed an HFD, and body weight was monitored. (B) Weight gain measured over 6 weeks of HFD feeding. (C) Picture of mice transferred ileal bacteria from WT or *Chst4*<sup>-/-</sup> mice. (D) Body weight, adipose, and liver weight at

6 weeks of HFD feeding. **(E)** Liver and adipose tissue were stained with HE and Oil Red O (n = 4). **(F)** Ileal contents from mice of both genotypes were isolated and suspended in PBS, followed by transfer to Abx-treated *Chst4*<sup>-/-</sup> mice. After transfer, the mice were fed an HFD, and body weight was monitored. **(G)** Weight gain measured over 6 weeks of HFD feeding. **(H)** Picture of mice transferred ileal bacteria from WT or *Chst4*<sup>-/-</sup> mice. **(I)** Body weight, adipose, and liver weight at 6 weeks of HFD feeding. **(J)** Liver and adipose tissues were stained with HE and Oil Red O (n = 4). Data are presented as the mean ± SD; \**P* < 0.05, \*\**P* < 0.01 via unpaired, two-tailed *t*-tests or two-way ANOVA.
